# Supplementary material for: Plasma engineering of silicon quantum dots and their properties through energy deposition and chemistry
Source: Royal Society of Chemistry journal article supplement (doi:10.1039/c6cp05647d), 2016-01-01
Supplement: c6cp05647d1.pdf [file c6cp05647d1.pdf]

## Supplementary information

### Importance of RF/UHF dual frequency PECVD

Our earlier experience shows that RF/UHF dual frequency sources can produce significantly high plasma density even at low power. If we apply equal power by RF and UHF sources the plasma density is much smaller than that of their combined effect. Plasma density is also radially uniform, which favors the deposition of uniform film thickness up to larger area.

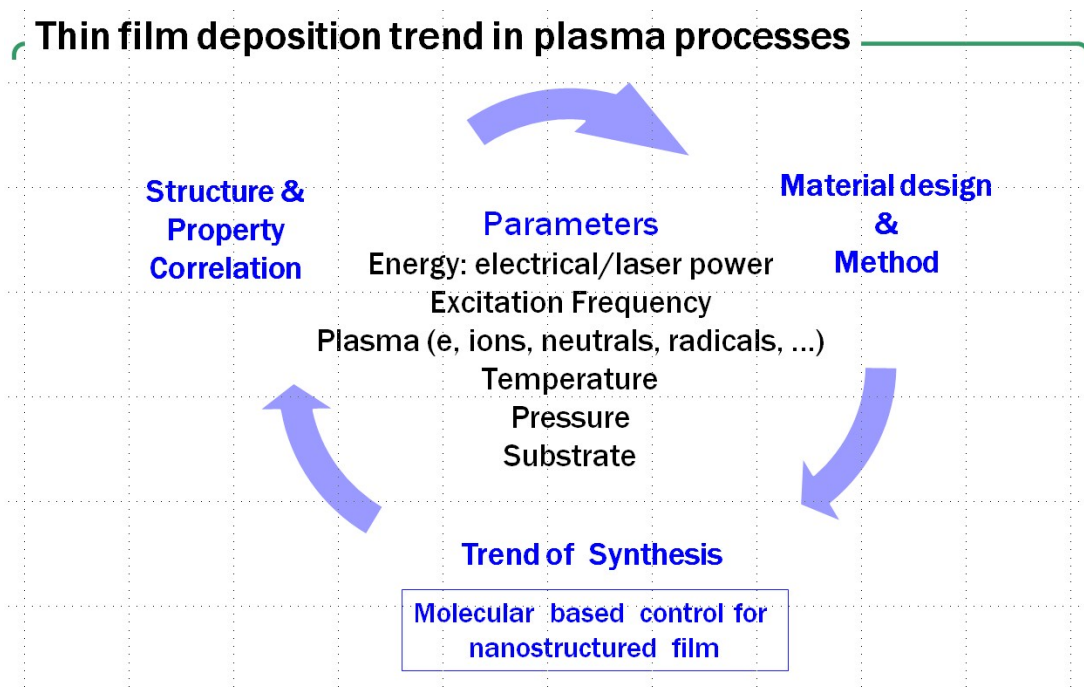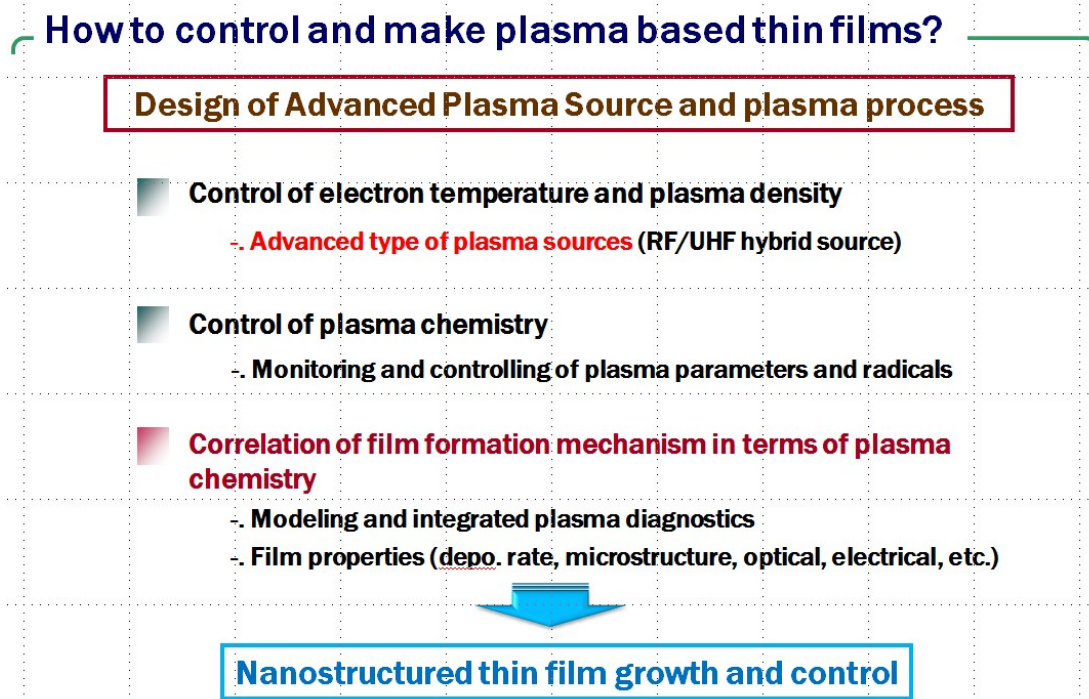

## Exploring new plasmas and processes

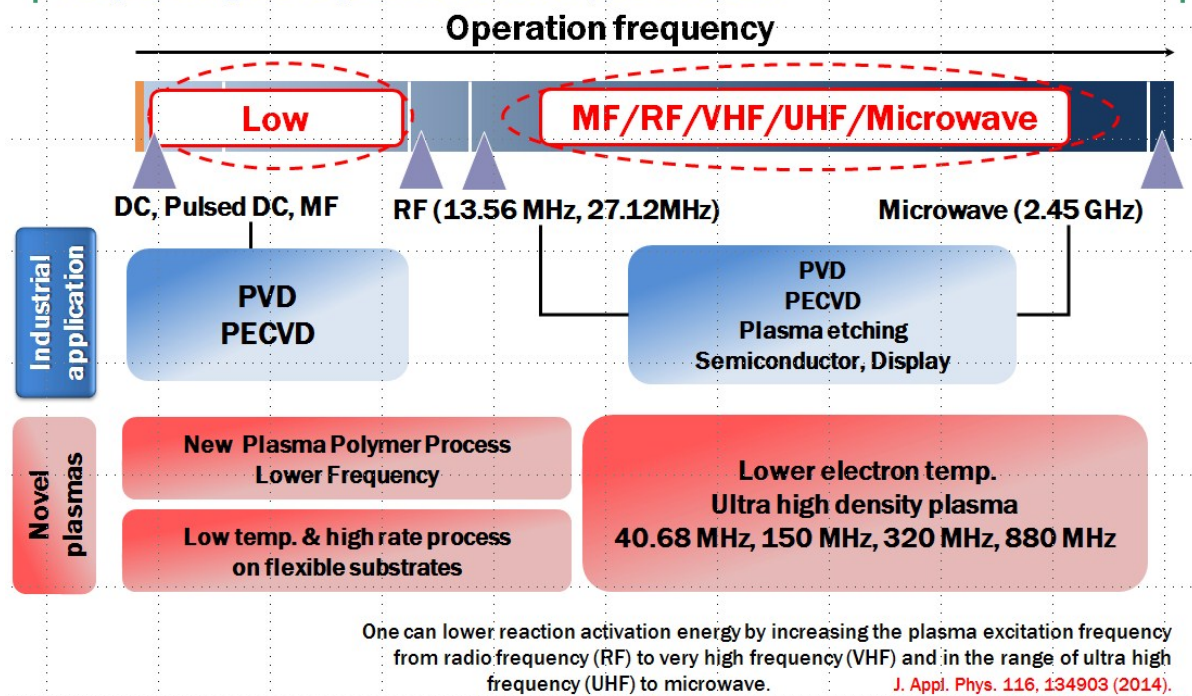

## Importance and suitability of RF/UHF hybrid plasma

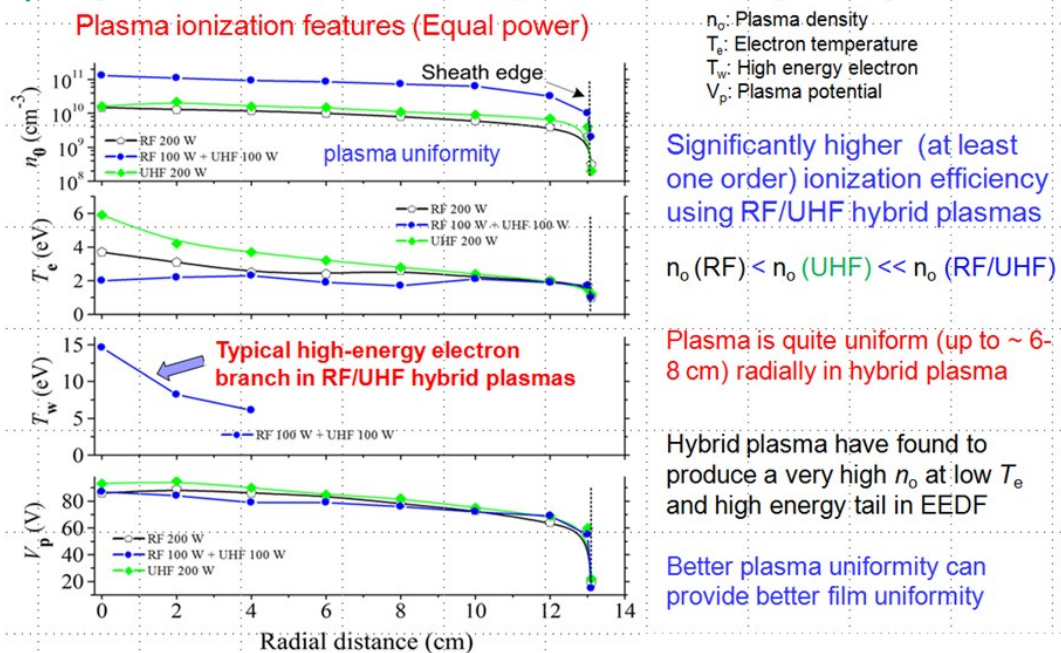

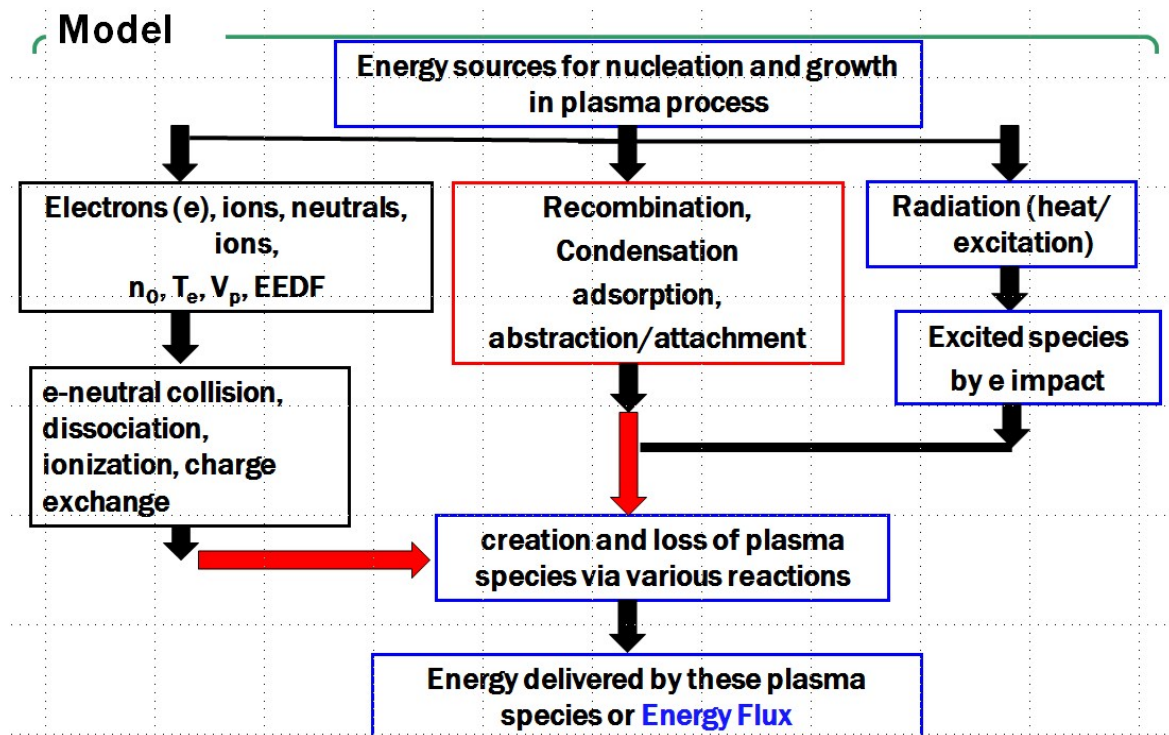

**Process optimization:** RF and UHF equal power has given the best QD feature.

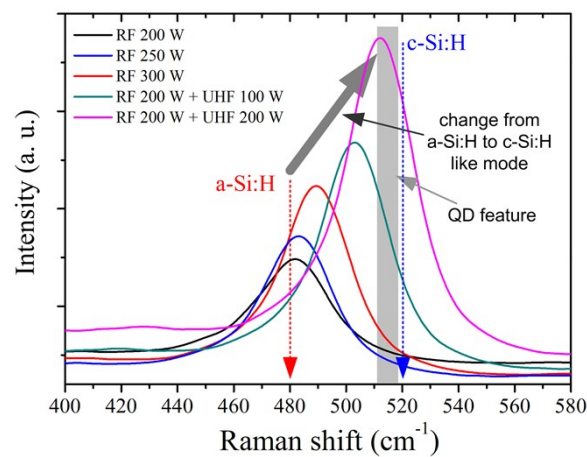

Raman spectra of the deposited films prepared at various operating powers. The figure also depicts the change in the film microstructure represented by the change in the peak positions at various applied powers.
